# Supplementary material for: Assessing the potential distribution of Myracrodruon urundeuva Allemão (Aroeira) in the Caatinga under climate change scenarios
Source: Frontiers journal article supplement (doi:10.3389/ffgc.2025.1519432), 2025-03-19
Supplement: Table_1.xlsx [file Table_1.xlsx]

## Sheet: coordenadas
longitude	latitude	aroeira	wc2.1_2.5m_bio_3	wc2.1_2.5m_bio_4	wc2.1_2.5m_bio_7	wc2.1_2.5m_bio_8	wc2.1_2.5m_bio_9	wc2.1_2.5m_bio_12	wc2.1_2.5m_bio_15	wc2.1_2.5m_bio_18	wc2.1_2.5m_bio_19
-41.0531	-6.8875	1	74.6796	102.135	14.98	24.5647	24.624	717	101.702	115	49
-38.5525	-3.78672	1	79.0963	54.1344	9.236	26.404	26.856	1585	90.4927	182	246
-40.55	-9.31678	1	76.1373	116.404	15.328	26.6393	24.6513	537	88.5086	146	17
-41.2761	-12.7194	1	75.1982	133.108	15.476	24.608	22.1633	1038	57.9117	372	96
-39.8663	-9.89433	1	71.0336	179.818	15.892	24.7693	21.2433	455	69.5774	175	35
-40.4572	-9.38306	1	74.4346	129.424	15.092	26.5587	24.1027	508	89.194	204	15
-41.5517	-14.0864	1	70.7497	139.128	15.748	24.4873	21.4933	566	86.5605	209	15
-39.1959	-3.37644	1	79.9639	56.9079	10.516	26.3153	26.878	1241	105.315	125	158
-38.8184	-4.24517	1	74.726	62.8183	11.072	23.444	23.5587	1358	87.986	166	218
-39.3387	-7.37211	1	72.4143	109.602	13.768	23.4887	22.604	1052	95.1926	144	108
-37.2486	-6.58139	1	76.0236	107.935	12.472	27.2307	26.294	758	115.412	92	60
-37.0742	-8.30306	1	71.7588	135.119	13.308	21.94	21.5467	751	65.4341	100	187
-40.2752	-6.94353	1	73.0643	108.265	14.224	24.4833	24.714	639	103.611	83	55
-36.7396	-9.6701	1	68.2543	171.651	13.668	22.3207	24.9813	663	69.8561	71	272
-43.0386	-8.09667	1	75.9264	97.0967	17.128	26.2593	25.3527	873	86.6546	166	24
-40.8409	-5.20186	1	75.7832	93.559	13.832	24.886	25.7227	845	112.271	61	119
-42.6	-11.8167	1	72.7877	109.922	18.608	23.7207	21.66	672	88.0917	174	5
-41.095	-13.9272	1	72.0143	137.353	13.844	24.4207	21.9733	624	76.1165	243	32
-39.1591	-6.36911	1	74.5396	111.708	14.044	26.1667	27.07	962	96.8721	74	327
-40.4625	-3.62978	1	82.0378	64.8362	13.688	24.0473	24.9833	1246	107.478	167	287
-41.9333	-14.5333	1	69.6247	144.525	16.52	23.8907	20.824	598	95.0088	298	3
-38.9752	-4.81464	1	79.511	56.4307	11.86	26.3273	26.524	824	102.582	98	213
-40.6725	-6.04278	1	75.7429	94.9043	13.236	23.61	24.4733	687	113.007	65	74
-40.0683	-9.52739	1	71.984	168.462	15.904	25.2633	22.0807	529	83.8065	236	24
-39.4918	-7.527	1	70.1674	131.327	14.692	21.404	20.826	951	81.9509	214	104
-40.2559	-7.19492	1	72.9485	106.054	14.396	23.792	23.6067	695	106.188	98	48
-39.6319	-11.6072	1	69.9025	170.491	14.772	25.5087	22.7593	518	40.4774	183	100
-39.1833	-9.15	1	69.5102	191.162	16.048	25.5293	23.0853	458	92.6523	192	23
-42.5278	-11.7431	1	72.466	108.932	17.456	22.03	19.8213	769	88.9995	192	5
-39.34	-3.81556	1	78.1771	61.6949	11.436	26.038	26.7773	872	110.925	83	94
-39.015	-4.97083	1	80.3691	59.2567	12.156	26.376	26.9587	847	100.302	103	223
-37.5567	-5.7925	1	72.4209	106.404	14.204	27.0753	27.2913	781	106.291	94	92
-40.0694	-5.40912	1	77.9218	84.0319	12.264	23.3407	24.2953	712	103.62	90	148
-40.8194	-9.96444	1	75.2997	144.862	16.352	24.652	21.796	465	85.5354	220	12
-41.8167	-13.2333	1	71.9391	121.289	16.564	19.494	17.6407	1127	58.3325	432	112
-41.6236	-13.6511	1	71.7375	129.126	16.46	24.0213	21.264	614	85.2936	298	14
-39.0372	-7.87517	1	69.1469	156.418	15.348	24.3793	22.0307	724	100.296	202	30
-41.5511	-11.405	1	73.1386	140.101	16.636	23.132	19.9367	567	88.9157	246	7
-39.5167	-12.7667	1	63.8117	148.917	11.08	24.3093	21.7187	672	33.5467	220	128
-40.2833	-9.28333	1	74.274	144.065	15.656	26.3533	23.5093	556	89.3264	208	18
-40.8408	-3.97028	1	79.8774	75.0751	14.14	20.7753	21.7447	1564	103.784	65	941
-38.4356	-6.43778	1	75.3144	102.019	13.572	24.5153	24.8687	901	100.127	130	198
-41.8343	-9.22828	1	78.1413	97.8943	17.392	26.1893	24.3587	612	91.6021	196	5
-38.1745	-6.96159	1	74.1257	114.466	13.916	26.28	25.926	943	109.206	165	52
-38.4372	-7.36849	1	69.9084	135.813	14.488	23.6133	22.86	922	101.501	180	67
-40.0622	-8.61903	1	74.1464	152.665	15.816	25.4493	22.7673	521	89.7562	169	23
-40.6965	-9.34553	1	76.7633	118.167	15.936	26.5367	24.5413	509	91.4921	136	15
-38.9417	-7.53808	1	70.8278	132.827	15.06	25.096	23.7007	887	99.6327	236	40
-39.8302	-8.00819	1	72.5402	138.898	15.34	25.234	23.2313	620	89.9641	195	26
-40.5625	-8.66503	1	76.1908	139.742	16.572	25.67	23.4507	488	93.9118	171	10
-38.7541	-6.84457	1	73.8296	109.088	13.784	25.3693	25.84	903	103.537	74	122
-38.015	-8.02703	1	67.7049	179.077	14.736	24.5187	22.3953	674	88.1316	146	65
-37.9523	-8.51539	1	67.4006	190.489	14.624	24.6113	22.1047	522	90.3741	195	43
-38.0042	-8.13639	1	66.5538	186.144	14.772	23.996	21.7193	649	85.283	144	68
-38.7831	-8.3785	1	67.8959	182.561	15.348	24.05	21.954	641	84.411	167	60
-38.6111	-7.09986	1	72.6207	118.283	14.192	25.3327	25.2773	913	107.22	182	104
-40.0408	-8.37214	1	74.152	144.475	15.684	25.3613	23	557	88.0612	186	25
-38.6101	-8.00361	1	68.2561	174.656	15.288	24.8147	23.0273	734	91.5024	190	49
-36.6003	-6.40333	1	78.3167	90.9653	12.06	25.4587	25.596	540	112.085	64	48
-38.4139	-7.81906	1	68.1371	165.358	14.848	24.3593	22.7727	819	90.7925	191	69
-38.4129	-8.47564	1	68.7484	178.217	15.66	25.2033	23.1367	557	87.7715	164	37
-38.6344	-4.24158	1	76.9402	59.8273	10.772	25.7227	25.422	1065	101.521	120	126
-37.2515	-8.05667	1	70.8656	150.391	13.948	23.872	22.3493	653	90.646	107	80
-37.5684	-7.86311	1	68.3786	164.702	13.688	23.538	21.5953	717	94.9951	114	79
-37.4719	-7.77562	1	69.1364	161.17	13.78	24.1127	22.2187	609	100.774	175	59
-39.1411	-7.54808	1	69.8699	136.079	14.756	23.5207	22.9713	921	90.1759	226	75
-38.839	-7.22043	1	71.9633	120.059	14.116	24.6373	23.71	938	100.076	227	95
-39.3049	-8.17513	1	68.6174	163.504	15.652	25.538	22.9347	625	97.0641	175	28
-39.3051	-7.571	1	70.1395	136.514	14.772	22.2	21.4727	948	84.3811	219	98
-37.7832	-8.33447	1	66.2411	188.643	14.412	24.3207	21.892	574	83.208	193	62
-43.4631	-15.7092	1	70.9611	138.59	17.604	24.5147	21.6827	841	96.6698	250	5
-38.3088	-8.59414	1	69.9396	180.62	15.888	26.0927	23.5567	493	97.1406	149	26
-37.8669	-8.37747	1	66.4684	190.438	14.456	24.5307	22.0587	555	87.4346	198	51
-38.3548	-8.76305	1	70.0146	180.415	15.94	26.3067	23.7593	415	97.215	135	24
-37.6842	-9.80528	1	65.6582	193.67	13.948	22.9073	25.2693	558	51.2508	101	192
-42.2254	-9.65569	1	76.3583	92.1582	17.056	26.876	25.304	642	91.9514	214	2
-42.6508	-14.7653	1	71.4476	127.93	16.036	23.252	20.516	809	100.151	412	2
-38.2269	-8.37689	1	67.608	186.795	14.944	24.5347	22.192	597	85.8203	161	53
-41.8756	-11.2481	1	74.2888	124.769	17.06	24.274	21.4633	614	90.4597	247	8
-41.9428	-11.165	1	74.7932	123.914	17.244	24.0533	21.244	577	90.7873	235	5
-37.0535	-6.20267	1	76.0878	103.732	12.656	27.3947	27.2393	782	107.222	94	78
-40.65	-5.205	1	75.9379	97.9293	14.252	25.5007	26.2673	787	118.465	128	32
-39.1831	-8.09925	1	68.7495	163.903	15.556	24.796	22.1793	626	98.356	177	26
-41.5778	-12.3503	1	72.5196	137.229	16.664	23.3433	20.9513	812	65.5188	299	60
-38.9921	-4.25444	1	72.5718	67.7001	11.888	21.4233	21.4773	1560	77.5948	198	309
-39.473	-8.47344	1	67.0356	166.227	15.992	25.7773	23.1147	485	104.803	60	20
-37.113	-7.84683	1	72.3373	134.003	14.284	23.4507	23.2053	734	84.2118	98	109
-44.1978	-14.2347	1	70.2397	131.412	18.22	25.1487	22.6413	907	94.969	261	11
-44.5536	-14.3875	1	69.7125	132.558	18.364	24.304	21.8293	988	94.8288	289	13
-39.3167	-10.4333	1	66.9444	193.366	16.684	23.472	21.8913	622	37.3249	200	132
-40.5775	-11.3783	1	70.5713	159.648	14.308	23.3507	21.0873	733	42.4078	263	136
-43.4	-9.50361	1	75.8489	86.456	18.024	25.0307	23.992	741	90.5098	149	0
-39	-10.5	1	69.1673	193.315	16.516	23.322	22.88	656	38.5692	184	182
-40.3167	-6.73431	1	73.7397	102.594	13.78	23.714	24.7207	629	104.13	70	68
-40.1208	-6.60028	1	75.3346	104.797	13.748	24.6413	25.5507	641	106.739	63	79
-43.7514	-14.2114	1	70.2082	127.053	17.676	25.332	22.9233	799	96.9833	220	3
-43.09	-9.48	1	76.7405	88.4581	17.888	25.5273	24.2073	697	90.6337	135	2
-39.87	-10.66	1	72.2929	171.891	15.256	25.042	22.452	715	38.8666	252	144
-41.37	-9.28	1	79.7666	110.838	18.224	26.762	25.07	574	92.8234	165	7
-41.1644	-12.8697	1	74.8637	134.023	15.896	24.6727	22.232	911	61.7628	331	75
-40.4197	-13.2644	1	70.1675	146.173	13.016	21.8133	18.818	676	59.2386	255	65
-40.8361	-11.1353	1	73.2581	159.045	15.768	23.7493	20.598	525	77.3463	227	28
-40.0833	-13.85	1	63.7826	148.98	11.396	24.332	21.3367	815	36.6952	245	143
-40.6917	-9.74667	1	75.0977	141.258	16.032	25.5607	22.7773	430	96.1745	184	4
-41.5	-13.5	1	72.108	126.944	16.436	21.4327	19.3793	789	64.7374	331	62
-42.7167	-10.8167	1	76.055	97.873	17.852	26.3333	24.2667	668	92.3194	138	4
-41.9128	-9.48555	1	77.7908	92.8647	17.104	26.7193	25.064	617	94.6144	192	3
-42.25	-11.6333	1	72.0048	113.89	16.76	22.2873	19.9067	704	87.7242	297	10
-42	-11.6333	1	72.5336	127.429	17.84	23.966	21.182	646	91.2975	280	8
-43.7114	-10.7828	1	73.7626	96.8739	19.772	24.8527	22.982	931	90.0921	214	3
-37.8185	-5.20322	1	75.6249	75.0106	13.228	26.344	27.248	839	108.426	71	113
-42.2467	-8.35556	1	78.2511	103.814	18.004	27.524	25.7213	715	95.3534	200	7
-42.2	-7.21667	1	74.1679	101.195	16.424	26.4467	25.6347	908	94.0321	124	30
-40.6333	-9.03333	1	76.6679	128.207	16.228	26.0887	24.1727	503	90.9061	130	13
-43.1375	-13.4622	1	72.0604	105.845	16.828	24.8647	23.0207	913	94.494	234	10
-43.6747	-15.3389	1	70.1044	135.623	17.696	25.172	22.468	813	97.3314	237	6
-41.2837	-11.8903	1	72.3382	155.211	15.428	21.078	19.4047	874	34.2583	283	179
-36.3197	-8.66389	1	69.5209	161.602	13.22	22.0447	21.8233	727	58.578	125	231
-37.7464	-6.34417	1	76.155	101.022	13.304	26.2733	25.7913	913	105.833	115	88
-36.5778	-7.06833	1	72.3793	131.192	12.732	23.7993	22.994	477	104.083	125	63
-36.6794	-9.16972	1	67.7243	161.602	12.796	19.8727	22.5093	1004	61.2422	146	386
-43.4889	-9.22167	1	75.8913	83.0344	17.204	24.2607	23.4273	795	88.4889	169	13
